# Supplementary material
Source: PubMed Central journal article supplement (PMC7086969)
Supplement: 705_2018_4037_MOESM1_ESM.pdf [file 705_2018_4037_MOESM1_ESM.pdf]

# The Fecal Virome of Red-crowned Cranes

Yan Wang<sup>1</sup>, Shixing Yang<sup>1</sup>, Dawei Liu<sup>3</sup>, Chenglin Zhou<sup>4</sup>, Wang Li<sup>4</sup>, Yuan Lin<sup>5</sup>, Xiaochun Wang<sup>1</sup>,

Quan Shen<sup>1</sup>, Hua Wang<sup>1</sup>, Chuang Li<sup>1</sup>, Minghui Zong<sup>1</sup>, Yuzhu Ding<sup>1</sup>, Qianben Song<sup>1</sup>, Xutao Deng<sup>6</sup>,

Dunwu Qi<sup>2</sup>, Wen Zhang<sup>1</sup>, Eric Delwart<sup>6</sup>

<sup>1</sup>School of Medicine, Jiangsu University, Zhenjiang 212013, Jiangsu, P.R. China;

<sup>2</sup> Sichuan Key Laboratory of Conservation Biology for Endangered Wildlife, Chengdu Research Base of Giant Panda Breeding, Chengdu 610000, Sichuan, P.R. China;

<sup>3</sup> College of Biology and the Environment, Nanjing Forestry Police College, Nanjing 210023, Jiangsu, P.R. China;

<sup>4</sup> Department of Medical Laboratory Testing , Jiangsu Taizhou People's Hospital, Taizhou 225300, Jiangsu, P.R. China;

<sup>5</sup>School of Basic Medical Sciences, Ningxia Medical University, Yinchuan 750021, Gansu, P.R. China;

<sup>6</sup>Blood Systems Research Institute, Department of Laboratory Medicine, University of California San Francisco, San Francisco, CA, USA.

\*Yan Wang and Shixing Yang contributed equally to this work.

✉ Wen Zhang

z0216wen@yahoo.com

**JOURNAL NAME: ARCHIVES OF VIROLOGY**

Fig. S1. Phylogenetic analysis of the novel picornaviruses identified in red-crowned cranes. Phylogenetic analysis based on the complete amino acid sequence of P2 proteins of Gapovirus, Grusavirus, and 35 representative strains of all the 35 genera in *Picornaviridae*.

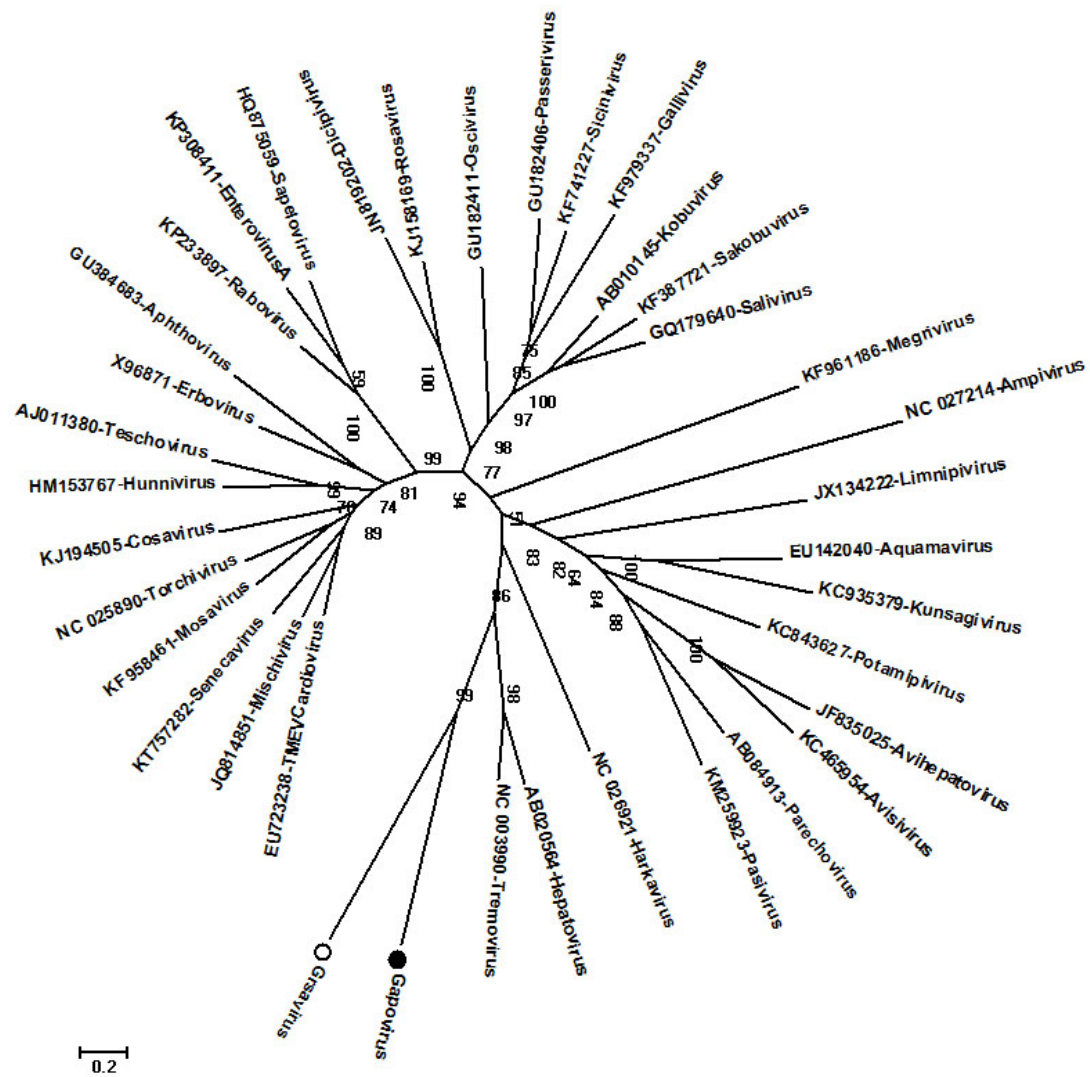

**Fig. S2. Sequence comparison of four novel picornaviruses of genus *Avihepatovirus* identified in red-crowned cranes with the representative strain (NC\_008250) based on the VP1-2A2 protein region.**

|            |   | Percent Identity |       |       |       |      |   |                |
|------------|---|------------------|-------|-------|-------|------|---|----------------|
|            |   | 1                | 2     | 3     | 4     | 5    |   |                |
| Divergence | 1 | ■                | 24.5  | 17.4  | 17.1  | 15.8 | 1 | NC_008250      |
|            | 2 | 200.0            | ■     | 30.7  | 64.8  | 26.5 | 2 | VP1-2A2-GrHAV1 |
|            | 3 | 268.0            | 122.5 | ■     | 21.6  | 29.0 | 3 | VP1-2A2-GrHAV2 |
|            | 4 | 223.0            | 40.4  | 163.7 | ■     | 21.0 | 4 | VP1-2A2-GrHAV3 |
|            | 5 | 248.0            | 142.6 | 131.0 | 177.0 | ■    | 5 | VP1-2A2-GrHAV4 |
|            |   | 1                | 2     | 3     | 4     | 5    |   |                |

**Table S1.** The summary of library information of red-crowned crane

| Library ID | Sample type | No. of Sample | Healthy status | habitation | Total no. of raw reads | No. of unique reads | No. of viral reads with E value <10 <sup>-5</sup> |
|------------|-------------|---------------|----------------|------------|------------------------|---------------------|---------------------------------------------------|
| 1          | Feces       | 14            | Normal         | Wild       | 642,992                | 558,303             | 37,298                                            |
| 2          | Feces       | 15            | Normal         | wild       | 589,512                | 448,999             | 28,898                                            |
| 3          | Feces       | 12            | Normal         | wild       | 208,348                | 155,485             | 11,258                                            |
| 4          | Feces       | 20            | Normal         | Breed      | 519,160                | 299,263             | 8,709                                             |
| 5          | Feces       | 16            | Normal         | Ornamental | 269,889                | 145,887             | 36,574                                            |
| 6          | Feces       | 16            | Normal         | Ornamental | 957,290                | 331,497             | 104,925                                           |

**Table S2.** Eukaryotic viral sequences of wild, breed and ornamental libraries, the families marked with highlight yellow were mainly studied in this study.

| Virus Families    | Virus Type      | No. of viral reads with E value <10 <sup>-5</sup> |                    |                    |                     |                          |                          |
|-------------------|-----------------|---------------------------------------------------|--------------------|--------------------|---------------------|--------------------------|--------------------------|
|                   |                 | Library1<br>(wild)                                | Library2<br>(wild) | Library3<br>(wild) | Library4<br>(breed) | Library5<br>(ornamental) | Library6<br>(ornamental) |
| Adenoviridae      | Mammalian virus | 3                                                 | 1                  | 4                  | 10                  | 42                       | 14                       |
| Alphaflexiviridae | Plant virus     | 2                                                 | 1                  | 0                  | 0                   | 0                        | 0                        |
| Alphatetraviridae | Insect virus    | 229                                               | 0                  | 0                  | 0                   | 0                        | 0                        |
| Alvernaviridae    | Plant virus     | 1                                                 | 0                  | 0                  | 0                   | 0                        | 0                        |
| Astroviridae      | Mammalian virus | 2                                                 | 0                  | 1                  | 3                   | 2                        | 24                       |
| Baculoviridae     | Insect virus    | 17                                                | 8                  | 1                  | 7                   | 2                        | 8                        |
| Barnaviridae      | Plant virus     | 8                                                 | 0                  | 0                  | 0                   | 0                        | 0                        |
| Betaflexiviridae  | Plant virus     | 0                                                 | 1                  | 0                  | 1                   | 1                        | 0                        |
| Bidnaviridae      | Insect virus    | 7                                                 | 9                  | 2                  | 0                   | 2                        | 0                        |
| Bromoviridae      | Plant virus     | 22                                                | 6                  | 0                  | 1                   | 0                        | 0                        |
| Caliciviridae     | Mammalian virus | 65                                                | 4                  | 2,274              | 30                  | 20                       | 8                        |
| Caulimoviridae    | Plant virus     | 3                                                 | 0                  | 1                  | 0                   | 2                        | 1                        |
| Circoviridae      | Mammalian virus | 1,669                                             | 2,218              | 1,034              | 69                  | 156                      | 69                       |
| Closteroviridae   | Plant virus     | 15                                                | 4                  | 2                  | 0                   | 0                        | 3                        |
| Dicistroviridae   | Insect virus    | 716                                               | 222                | 67                 | 101                 | 384                      | 472                      |
| Endomaviridae     | Plant virus     | 4                                                 | 0                  | 0                  | 0                   | 0                        | 0                        |
| Geminiviridae     | Plant virus     | 184                                               | 281                | 123                | 330                 | 67                       | 32                       |
| Hepeviridae       | Mammalian virus | 27                                                | 0                  | 0                  | 1                   | 7                        | 2                        |
| Iflaviridae       | Insect virus    | 39                                                | 16                 | 2                  | 22                  | 65                       | 37                       |
| Iridoviridae      | Insect virus    | 37                                                | 70                 | 8                  | 16                  | 0                        | 7                        |
| Luteoviridae      | Plant virus     | 51                                                | 6                  | 3                  | 2                   | 4                        | 6                        |

|                     |                   |        |        |       |       |        |        |
|---------------------|-------------------|--------|--------|-------|-------|--------|--------|
| Malacoherpesviridae | Molluscs virus    | 4      | 2      | 0     | 0     | 0      | 0      |
| Mamaviridae         | Plant virus       | 29     | 29     | 9     | 3     | 2      | 0      |
| Mesoniviridae       | Insect virus      | 1      | 0      | 0     | 0     | 0      | 0      |
| Nanoviridae         | Plant virus       | 391    | 195    | 78    | 8     | 4      | 4      |
| Nimaviridae         | crustaceans virus | 2      | 2      | 1     | 0     | 0      | 0      |
| Nodaviridae         | Aquatic virus     | 26     | 34     | 4     | 11    | 2      | 1      |
| None                | unclassified      | 16,254 | 14,596 | 5,708 | 1,637 | 929    | 893    |
| Nudiviridae         | Insect virus      | 0      | 2      | 0     | 0     | 0      | 1      |
| Ophioviridae        | Plant virus       | 0      | 1      | 0     | 0     | 0      | 0      |
| Partitiviridae      | Plant virus       | 3      | 1      | 1     | 4     | 32     | 21     |
| Parvoviridae        | Mammalian virus   | 8,935  | 3,765  | 1,167 | 6,052 | 21,626 | 17,912 |
| Permutotetraviridae | Insect virus      | 9      | 24     | 14    | 0     | 0      | 1      |
| Phycodnaviridae     | Plant virus       | 639    | 602    | 246   | 38    | 24     | 49     |
| Picornaviridae      | Mammalian virus   | 7,158  | 6,295  | 397   | 276   | 13,159 | 85,270 |
| Polydnaviridae      | Insect virus      | 1      | 2      | 1     | 0     | 0      | 7      |
| Potyviridae         | Plant virus       | 10     | 5      | 3     | 0     | 0      | 0      |
| Reoviridae          | eukaryote         | 19     | 3      | 1     | 0     | 3      | 1      |
| Roniviridae         | crustaceans virus | 0      | 1      | 0     | 1     | 0      | 0      |
| Secoviridae         | Plant virus       | 50     | 21     | 15    | 12    | 7      | 9      |
| Tombusviridae       | Plant virus       | 608    | 327    | 58    | 40    | 18     | 43     |
| Totiviridae         | protozoa virus    | 2      | 0      | 0     | 0     | 4      | 0      |
| Tymoviridae         | Plant virus       | 0      | 1      | 0     | 0     | 0      | 0      |
| Virgaviridae        | Plant virus       | 7      | 2      | 5     | 6     | 5      | 2      |

**Table S3.** Comparison of the cleavage sites of GrHAV1-4 and the representative strain

| Virus strains | Cleavage sites of different proteins of <i>Avihepatovirus</i> |         |         |         |        |       |       |       |       |       |
|---------------|---------------------------------------------------------------|---------|---------|---------|--------|-------|-------|-------|-------|-------|
|               | VP0/VP3                                                       | VP3/VP1 | VP1/2A1 | 2A1/2A2 | 2A2/2B | 2B/2C | 2C/3A | 3A/3B | 3B/3C | 3C/3D |
| NC_008250     | Q/G                                                           | Q/G     | E/S     | G/P     | Q/S    | Q/S   | Q/S   | Q/S   | Q/S   | Q/G   |
| GrHAV1        | Q/G                                                           | Q/G     | N       | N       | Q/G    | M/E   | Q/G   | Q/S   | Q/G   | Q/G   |
| GrHAV2        | Q/G                                                           | L/G     | N       | N       | Q/A    | D/L   | Q/G   | H/N   | Q/P   | Q/G   |
| GrHAV3        | Q/G                                                           | Q/G     | N       | N       | Q/G    | Q/S   | Q/G   | Q/S   | Q/G   | Q/G   |
| GrHAV4        | Q/G                                                           | V/G     | N       | N       | Q/G    | E/S   | Q/S   | N/G   | Q/G   | Q/G   |
